# Supplementary material
Source: PubMed Central journal article supplement (PMC6156676)
Supplement: pnas.1807026115.sapp.pdf [file pnas.1807026115.sapp.pdf]

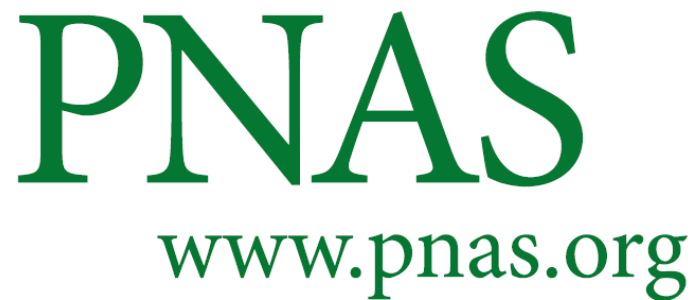

## Supplementary Information for

Linking economic growth pathways and environmental sustainability by understanding development as alternate social-ecological regimes

Graeme S. Cumming and Stephan von Cramon-Taubadel

Corresponding author: Graeme S. Cumming  
Email: [graeme.cumming@jcu.edu.au](mailto:graeme.cumming@jcu.edu.au)

### **This PDF file includes:**

Table S1

**Table S1. Estimated values and standard errors of the parameters used in the model.**

| <b>Parameter</b> | <b>Estimate</b> | <b>Standard error</b> |
|------------------|-----------------|-----------------------|
| a (for HDI1)     | 12583           | 4030                  |
| a (for HDI4)     | -490            | 185                   |
| b                | 0.098761        | 0.003032              |
| c (for HDI1)     | 29419           | 3431                  |
| c (for HDI4)     | 2260            | 498                   |
| d                | -0.152538       | 0.026624              |
| f                | 4.962           | 0.3033                |
| g                | -5.1939         | 0.4226                |
